# Supplementary material
Source: PubMed Central journal article supplement (PMC9953754)
Supplement: NIHMS1779332-supplement-1.pdf [file NIHMS1779332-supplement-1.pdf]

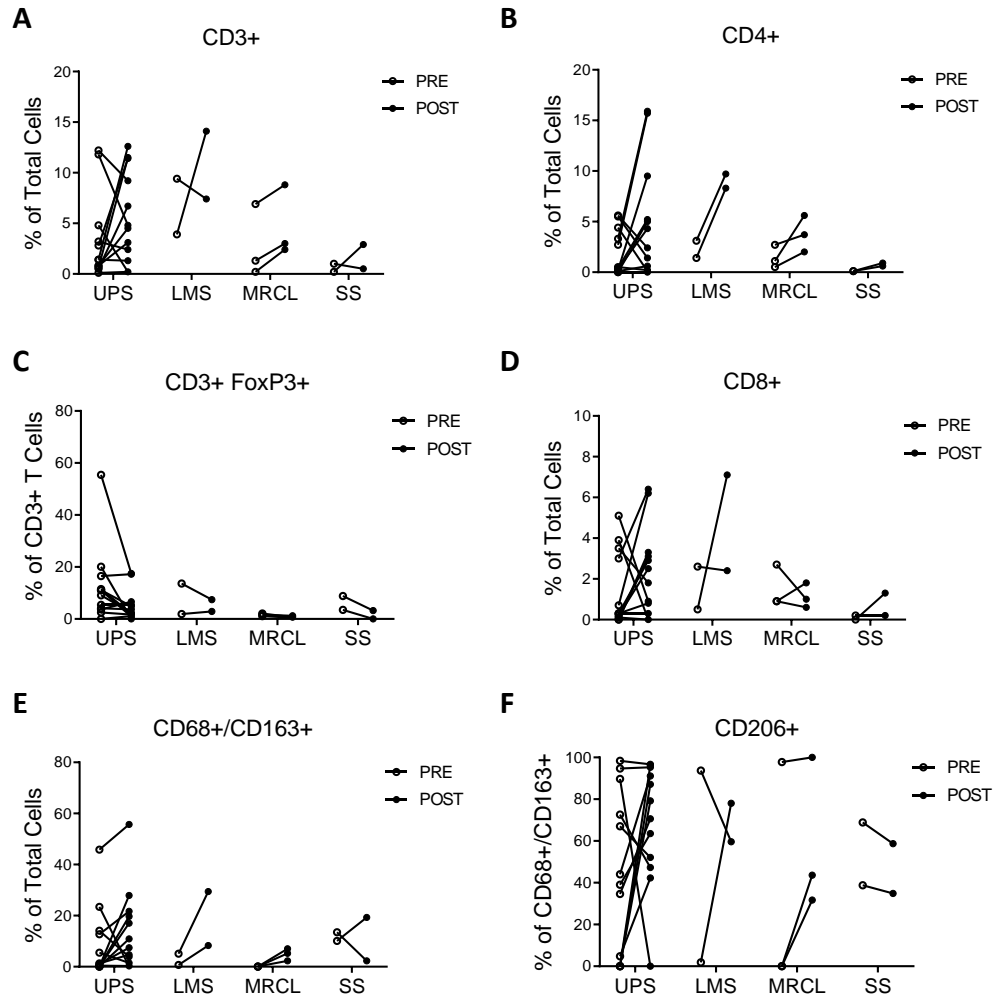

Supplemental Fig. S1. Percentage of immune cell populations detected by mIHC pre- and post-neoadjuvant therapy by sarcoma subtype. Individual samples pre-/post- paired are shown. (A) CD3+ cells, (B) CD4+ cells, (C) FOXP3+ T cells, (D) CD8+ cells, (E) CD68+/CD163+ cells and (F) CD206+ cells. UPS: Undifferentiated pleomorphic sarcoma (n=12); LMS: Leiomyosarcoma (n=2); MRCL: Myxoid/round cell liposarcoma (n=3); SS: Synovial Sarcoma (n=2). Based on the small sample sizes, these represent descriptive comparisons only.

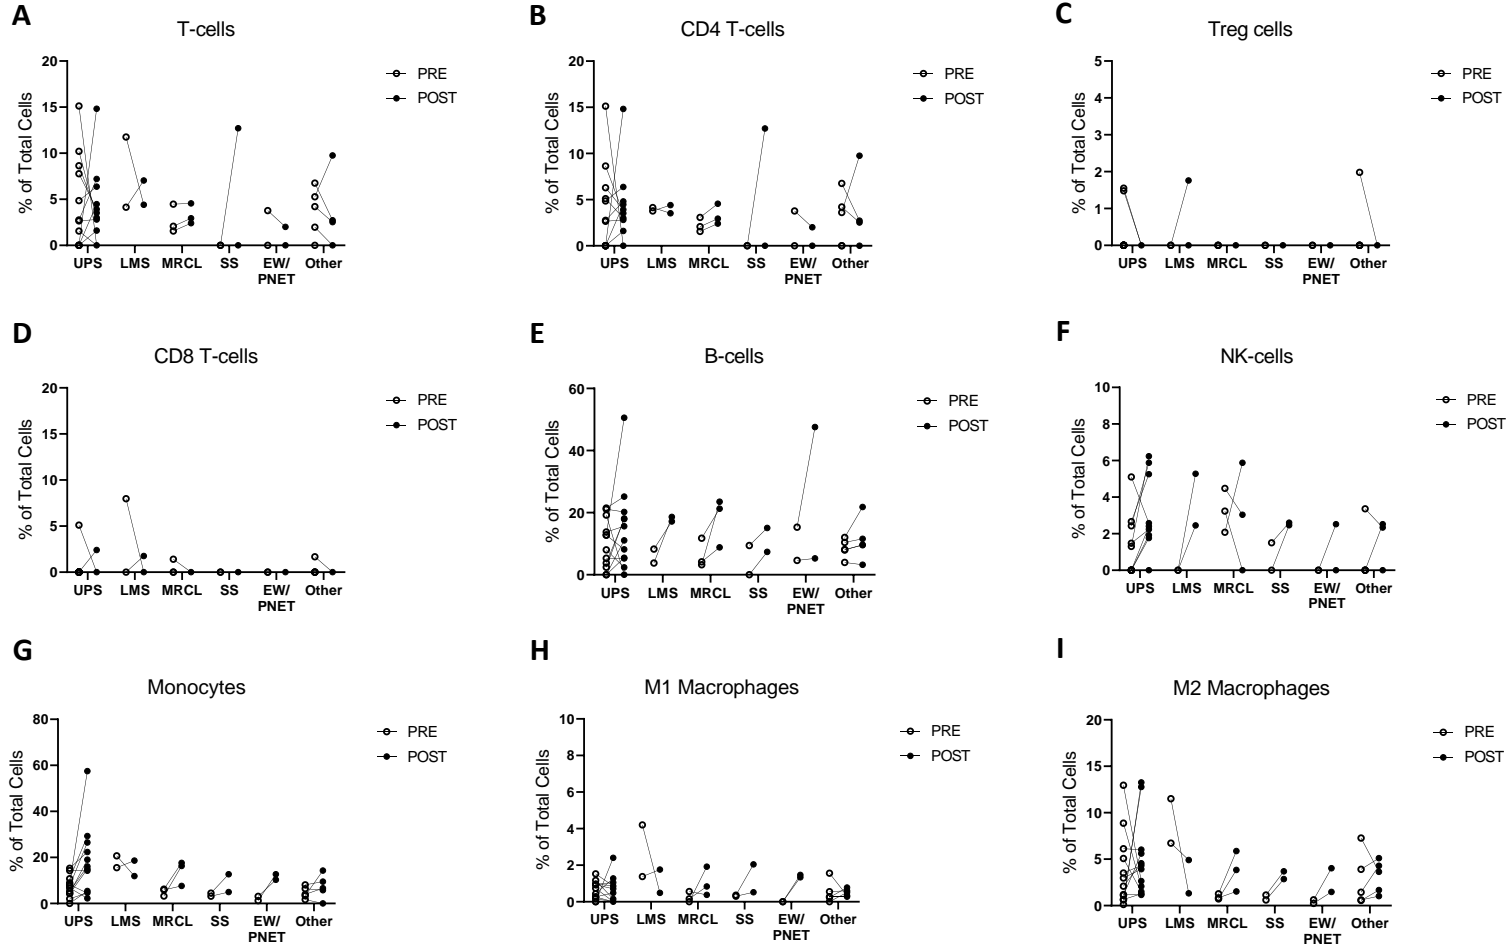

Supplemental Fig. S2. Percentage of immune cell populations analyzed by ImmunoPrism pre- and post- neoadjuvant therapy by sarcoma subtype. Individual samples pre-/post- paired are shown. (A) Total T- cells; (B) CD4 T- cells, (C) T regulatory (Treg) cells; (D) CD8 T cells; (E) B cells; (F) NK cells; (G) Monocytes; (H) M1 Macrophages; and (I) M2 Macrophages. UPS: Undifferentiated pleomorphic sarcoma (n=12); LMS: Leiomyosarcoma (n=2); MRCL: Myxoid/round cell liposarcoma (n=3); SS: Synovial Sarcoma (n=2); EW: Ewing sarcoma (n=2) and other (n=5). Based on the small sample sizes, these represent descriptive comparisons only.

A

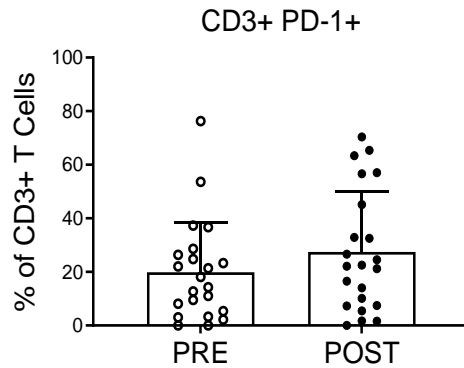

B

| ImmunoPrism Gene Expression |                          |               |             |
|-----------------------------|--------------------------|---------------|-------------|
| Gene ID                     | Fold change (post / pre) | Paired t-test | Significant |
| OX40                        | 0.90                     | 0.0321        | *           |
| TIM-3                       | 3.70                     | 0.0002        | *           |
| CTLA4                       | 1.70                     | 0.1170        | ns          |
| PD-1                        | 3.10                     | 0.3347        | ns          |
| PD-L1                       | 1.40                     | 0.7070        | ns          |
| BTLA                        | 4.40                     | 0.6345        | ns          |
| ICOS                        | 1.90                     | 0.6821        | ns          |
| CD47                        | 1.30                     | 0.1127        | ns          |
| IDO1                        | 2.30                     | 0.2239        | ns          |
| ARG1                        | 1.40                     | 0.9466        | ns          |

C

| NanoString Immune Inhibitory Molecules |                          |         |             |
|----------------------------------------|--------------------------|---------|-------------|
| Gene ID                                | Fold change (post / pre) | q-value | Significant |
| CD276 (B7-H3)                          | 0.58                     | 0.0013  | *           |
| PDCD1LG2 (PD-L2)                       | 1.43                     | 0.0027  | *           |
| ADORA2A                                | 0.66                     | 0.0132  | *           |
| HAVCR2 (TIM3)                          | 1.34                     | 0.0047  | *           |
| CD96                                   | 1.60                     | 0.0528  | ns          |
| CTLA4                                  | 0.62                     | 0.4929  | ns          |
| CD274 (PD-L1)                          | 0.96                     | 0.6662  | ns          |
| LAG3                                   | 0.97                     | 0.9218  | ns          |
| TIGIT                                  | 0.98                     | 0.8343  | ns          |
| PDCD1 (PD1)                            | 0.89                     | 0.9855  | ns          |

D

| NanoString Immune Stimulating Molecules |                          |         |             |
|-----------------------------------------|--------------------------|---------|-------------|
| Gene ID                                 | Fold change (post / pre) | q-value | Significant |
| TNFRSF4 (OX40)                          | 0.45                     | 0.0003  | *           |
| TNFRSF18                                | 1.37                     | 0.0527  | *           |
| CD86 (B7-2)                             | 1.64                     | 0.0003  | *           |
| CD28                                    | 1.37                     | 0.2657  | ns          |
| CD226                                   | 0.89                     | 0.2906  | ns          |
| TNFSF4 (OX-40L)                         | 0.87                     | 0.3957  | ns          |
| ICOS                                    | 0.74                     | 0.4032  | ns          |
| TNFRSF9 (CD137)                         | 0.66                     | 0.4555  | ns          |
| CD40                                    | 0.89                     | 0.7071  | ns          |
| CD27                                    | 0.67                     | 0.7870  | ns          |
| TNFRSF18                                | 0.98                     | 0.8110  | ns          |
| TNFSF9 (CD137L)                         | 1.08                     | 0.8276  | ns          |
| CD80 (B7-1)                             | 0.92                     | 0.8472  | ns          |
| CD40LG                                  | 1.07                     | 0.9539  | ns          |

Supplemental Fig. S3. Changes in immune modulatory gene expression in the sarcoma tumor immune microenvironment from pre- to post-neoadjuvant therapy as determined by (A) multiplex IHC assaying the percentage of CD3+ cells that are positive for PD-1, and transcriptional profiling with (B) ImmunoPrism, and (C-D) NanoString. Results are reported fold-change (post / pre neoadjuvant therapy) for ImmunoPrism and NanoString data with statistical analyses utilizing paired t-test and the Benjamini-Hochberg q-values, respectively.

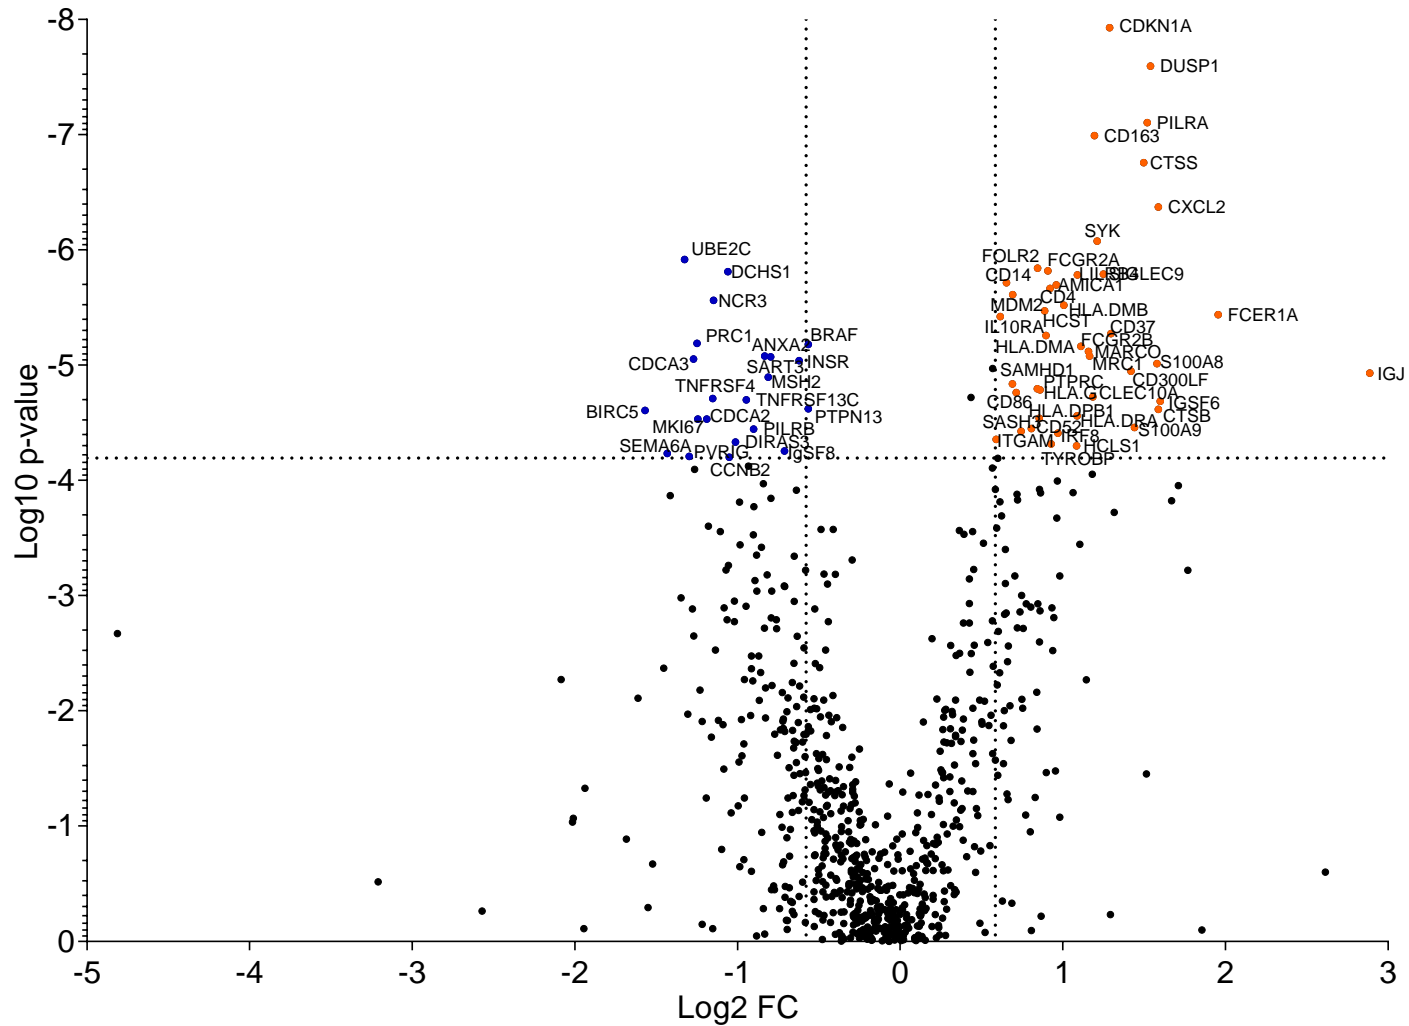

Supplemental Fig. S4. Volcano plot showing genes significantly up-regulated ( $\geq 1.5$ ,  $n=43$ , orange) or down-regulated ( $\leq -0.67$ ,  $n=22$ , blue) pre- versus post- neoadjuvant therapy. Symbols for the genes with  $p$ -value  $< 0.0000643$  (Bonferroni cut-off  $0.05/778$ ) are indicated.
