# Supplementary material
Source: PubMed Central journal article supplement (PMC9953754)
Supplement: NIHMS1779332-supplement-2.pdf [file NIHMS1779332-supplement-2.pdf]

| Histological subtype                 | Total | RT<br>alone | RT + Chemotherapy |        |            |                           |
|--------------------------------------|-------|-------------|-------------------|--------|------------|---------------------------|
|                                      |       |             | AIM               | VDC/IE | Ifosfamide | Gemcytabine/<br>docetaxel |
| UPS                                  | 14    | 2           | 11                | 0      | 0          | 1                         |
| Ewing                                | 3     | 0           | 0                 | 3      | 0          | 0                         |
| Leiomyosarcoma                       | 2     | 2           | 0                 | 0      | 0          | 0                         |
| Myxoid                               | 3     | 1           | 2                 | 0      | 0          | 0                         |
| Synovial                             | 3     | 0           | 2                 | 0      | 1          | 0                         |
| Other                                | 7     | 6           | 1                 | 0      | 0          | 0                         |
| Myxofibrosarcoma                     | 2     | 2           | 0                 | 0      | 0          | 0                         |
| Fibroblastic-myofibroblastic sarcoma | 1     | 1           | 0                 | 0      | 0          | 0                         |
| Sarcoma with epithelioid features    | 1     | 0           | 1                 | 0      | 0          | 0                         |
| Solitary fibrous tumor               | 1     | 1           | 0                 | 0      | 0          | 0                         |
| Sclerosing epithelioid fibrosarcoma  | 1     | 1           | 0                 | 0      | 0          | 0                         |
| Fibromyxoid sarcoma                  | 1     | 1           | 0                 | 0      | 0          | 0                         |

Supplemental Table S1. Distribution of number of patients receiving radiotherapy (RT) alone or chemotherapy and RT organized by histological subtype and type of chemotherapy. AIM: anthracycline, ifosfamide and mesna; VDC/IE: vincristine, doxorubicin and cyclophosphamide/ ifosfamide and etoposide.

**Panel 1**

| Position                         | Antibody     | Clone / Host                  | Company / Item                   | Concentration            | OPAL Fluor |
|----------------------------------|--------------|-------------------------------|----------------------------------|--------------------------|------------|
| 1                                | CD3          | SP7 / Rabbit                  | Thermo / RM-9107                 | 0.06 ug/ml               | 520        |
| 2                                | FoxP3        | 236A/E7 / Mouse               | eBioscience / 14-4777-82         | 5 ug/ml                  | 690        |
| 3                                | PD-1         | EH33 / Mouse                  | Cell Signaling / 43248           | 0.19 ug/ml               | 570        |
| 4                                | VISTA        | D1L2G / Rabbit                | Cell Signaling / 64953S          | 0.19 ug/ml               | 620        |
| 5                                | CD206        | CLO387 / Mouse                | Novus / NBP2-52927               | 1 ug/ml                  | 570        |
| 6                                | CD163 + CD68 | EP324/Rabbit +<br>PG-M1/Mouse | BioSB/BSB3276 +<br>DAKO/M0876    | 0.125 ug/ml + 0.04 ug/ml | 690        |
| Secondary Opal Polymer HRP Ms+Rb |              |                               | Akoya Biosciences /<br>ARH1001EA | RTU                      |            |

**Panel 2**

| Position                         | Antibody | Clone / Host      | Company / Item                   | Concentration | OPAL Fluor |
|----------------------------------|----------|-------------------|----------------------------------|---------------|------------|
| 1                                | CD8      | C8/144B / Mouse   | DAKO / M7103                     | 0.05 ug/ml    | 520        |
| 2                                | CD66b    | G10F5 / Mouse     | BD Pharm. / 555723               | 2.4 ug/ml     | 540        |
| 3                                | CD33     | RBT-CD33 / Rabbit | Bio SB / BSB3451                 | 1.0 ug/ml     | 620        |
| 4                                | HLA-DR   | EP96 / Rabbit     | Bio SB / 6797                    | 0.13 ug/ml    | 570        |
| 5                                | CD4      | EP204 / Rabbit    | Epitomics / AC0173A              | 0.08 ug/ml    | 690        |
| 6                                | Ki67     | MIB1 / Mouse      | DAKO / M7240                     | 0.23 ug/ml    | 650        |
| Secondary Opal Polymer HRP Ms+Rb |          |                   | Akoya Biosciences /<br>ARH1001EA | RTU           |            |

Supplemental Table S2. Multiplex immunohistochemistry antibodies.

|                                   | Timepoint | Mean  | SD    | Lower<br>95% CI | Upper<br>95% CI | n  | P value      | Significant |
|-----------------------------------|-----------|-------|-------|-----------------|-----------------|----|--------------|-------------|
| T-cells (% of total cells)        | Pre-RT    | 3.83  | 4.09  | 2.18            | 5.48            | 26 | 0.979        | ns          |
|                                   | Post-RT   | 3.80  | 3.91  | 2.22            | 5.38            | 26 |              |             |
| CD4 T-cells (% of total cells)    | Pre-RT    | 3.02  | 3.52  | 1.60            | 4.44            | 26 | 0.605        | ns          |
|                                   | Post-RT   | 3.57  | 3.80  | 2.04            | 5.11            | 26 |              |             |
| Treg T-cells (% of total cells)   | Pre-RT    | 0.19  | 0.55  | -0.03           | 0.41            | 26 | 0.350        | ns          |
|                                   | Post-RT   | 0.07  | 0.35  | -0.07           | 0.21            | 26 |              |             |
| CD8 T-cells (% of total cells)    | Pre-RT    | 0.62  | 1.84  | -0.12           | 1.36            | 26 | 0.245        | ns          |
|                                   | Post-RT   | 0.16  | 0.57  | -0.07           | 0.39            | 26 |              |             |
| Monocytes (% of total cells)      | Pre-RT    | 6.74  | 5.01  | 4.72            | 8.77            | 26 | <b>0.002</b> | <b>**</b>   |
|                                   | Post-RT   | 14.06 | 11.48 | 9.43            | 18.70           | 26 |              |             |
| M1 macrophages (% of total cells) | Pre-RT    | 0.65  | 0.88  | 0.30            | 1.01            | 26 | 0.504        | ns          |
|                                   | Post-RT   | 0.81  | 0.67  | 0.54            | 1.08            | 26 |              |             |
| M2 macrophages (% of total cells) | Pre-RT    | 3.18  | 3.63  | 1.72            | 4.65            | 26 | 0.426        | ns          |
|                                   | Post-RT   | 4.01  | 3.09  | 2.77            | 5.26            | 26 |              |             |
| B-cells (% of total cells)        | Pre-RT    | 8.60  | 6.23  | 6.09            | 11.12           | 26 | <b>0.006</b> | <b>**</b>   |
|                                   | Post-RT   | 15.41 | 12.13 | 10.51           | 20.31           | 26 |              |             |
| NK-cells (% of total cells)       | Pre-RT    | 1.06  | 1.57  | 0.43            | 1.70            | 26 | <b>0.010</b> | <b>*</b>    |
|                                   | Post-RT   | 2.21  | 2.07  | 1.37            | 3.04            | 26 |              |             |

Supplemental Table S3. Percentage of cells assessed by the CoFactor ImmunoPrism assay, pre- and post-neoadjuvant therapy. SD, standard deviation; CI, confidence interval. Statistical differences were tested using two-tailed paired t-tests. \* p-value <0.05; \*\*<0.01.

|                                 | Timepoint | Mean  | SD    | Lower 95% CI | Upper 95% CI | n  | P value      | Significant |
|---------------------------------|-----------|-------|-------|--------------|--------------|----|--------------|-------------|
| CD3+ (% of Total cells)         | Pre-RT    | 3.33  | 3.93  | 1.44         | 5.23         | 19 | 0.069        | ns          |
|                                 | Post-RT   | 5.63  | 4.49  | 3.47         | 7.80         |    |              |             |
| CD4+ (% of Total cells)         | Pre-RT    | 1.68  | 1.92  | 0.76         | 2.61         | 19 | <b>0.015</b> | *           |
|                                 | Post-RT   | 4.80  | 4.97  | 2.40         | 7.19         |    |              |             |
| CD8+ (% of Total cells)         | Pre-RT    | 1.33  | 1.60  | 0.56         | 2.10         | 19 | 0.175        | ns          |
|                                 | Post-RT   | 2.24  | 2.19  | 1.19         | 3.30         |    |              |             |
| FoxP3+ (% of CD3+ cells)        | Pre-RT    | 9.63  | 12.46 | 3.63         | 15.64        | 19 | <b>0.023</b> | *           |
|                                 | Post-RT   | 4.17  | 5.12  | 1.71         | 6.64         |    |              |             |
| FoxP3- cells (% of CD3+ cells)  | Pre-RT    | 90.14 | 12.45 | 84.14        | 96.14        | 19 | <b>0.021</b> | *           |
|                                 | Post-RT   | 95.73 | 5.17  | 93.24        | 98.22        |    |              |             |
| CD68+ CD163+ (% of Total cells) | Pre-RT    | 7.05  | 11.56 | 1.48         | 12.62        | 19 | 0.055        | ns          |
|                                 | Post-RT   | 12.87 | 13.92 | 6.17         | 19.58        |    |              |             |
| CD206+ (% of Total cells)       | Pre-RT    | 4.85  | 10.46 | -0.20        | 9.89         | 19 | <b>0.031</b> | *           |
|                                 | Post-RT   | 9.84  | 13.51 | 3.33         | 16.35        |    |              |             |
| CD33+ CD66b- (% of Total cells) | Pre-RT    | 2.14  | 2.18  | 1.09         | 3.19         | 19 | 0.132        | ns          |
|                                 | Post-RT   | 3.91  | 5.38  | 1.31         | 6.50         |    |              |             |
| CD33+ CD66b+ (% Total cells)    | Pre-RT    | 0.07  | 0.27  | -0.06        | 0.21         | 19 | 0.681        | ns          |
|                                 | Post-RT   | 0.05  | 0.08  | 0.01         | 0.09         |    |              |             |
| CD33- CD66b+ (% Total cells)    | Pre-RT    | 1.98  | 3.56  | 0.27         | 3.69         | 19 | 0.493        | ns          |
|                                 | Post-RT   | 3.00  | 4.79  | 0.69         | 5.31         |    |              |             |

Supplemental Table S4. Percentage of immune cells (T cells and myeloid) pre- and post- neoadjuvant therapy evaluated by mIHC. SD, standard deviation; CI, confidence interval. Statistical differences were tested using two-tailed paired t-tests. \* p-value <0.05.

|                                                            | Timepoint | Mean  | SD    | Lower<br>95% CI | Upper<br>95% CI | n  | P value      | Significant |
|------------------------------------------------------------|-----------|-------|-------|-----------------|-----------------|----|--------------|-------------|
| PD1+ (% of CD3+ cells)                                     | Pre-RT    | 20.45 | 20.04 | 10.79           | 30.10           | 19 | 0.476        | ns          |
|                                                            | Post-RT   | 24.44 | 22.16 | 13.76           | 35.12           | 19 |              |             |
| HLA-DR+ (% of CD4+ cells)                                  | Pre-RT    | 19.62 | 16.61 | 11.61           | 27.62           | 19 | 0.701        | ns          |
|                                                            | Post-RT   | 21.31 | 13.38 | 14.86           | 27.75           | 19 |              |             |
| ki67+ (% of CD4+ cells)                                    | Pre-RT    | 7.02  | 9.11  | 2.62            | 11.41           | 19 | 0.972        | ns          |
|                                                            | Post-RT   | 7.13  | 9.04  | 2.78            | 11.49           | 19 |              |             |
| HLA-DR+ (% of CD8+ cells)                                  | Pre-RT    | 5.01  | 4.67  | 2.69            | 7.33            | 18 | 0.096        | ns          |
|                                                            | Post-RT   | 9.01  | 7.82  | 4.99            | 13.03           | 17 |              |             |
| ki67+ (% of CD8+ cells)                                    | Pre-RT    | 9.04  | 11.64 | 3.26            | 14.83           | 18 | 0.457        | ns          |
|                                                            | Post-RT   | 7.41  | 4.05  | 5.32            | 9.49            | 17 |              |             |
| HLA-DR+ CD4- CD8- (% of total cells)                       | Pre-RT    | 5.95  | 6.56  | 2.79            | 9.11            | 19 | <b>0.003</b> | <b>**</b>   |
|                                                            | Post-RT   | 14.54 | 11.39 | 9.05            | 20.03           | 19 |              |             |
| ki67+ CD4- CD8- HLA-DR- CD33- CD66b-<br>(% of total cells) | Pre-RT    | 10.08 | 12.19 | 4.21            | 15.96           | 19 | <b>0.010</b> | <b>*</b>    |
|                                                            | Post-RT   | 2.30  | 2.50  | 1.09            | 3.50            | 19 |              |             |
| VISTA+ (% of CD3+ cells)                                   | Pre-RT    | 13.86 | 10.64 | 8.73            | 18.99           | 19 | 0.632        | ns          |
|                                                            | Post-RT   | 12.48 | 11.65 | 6.87            | 18.09           | 19 |              |             |
| VISTA+ (% of CD68+ CD163+)                                 | Pre-RT    | 35.12 | 33.39 | 19.02           | 51.21           | 19 | 0.551        | ns          |
|                                                            | Post-RT   | 29.91 | 24.23 | 18.23           | 41.58           | 19 |              |             |

Supplemental Table S5. Percentage of cells expressing PD1, HLA-DR, ki67 and VISTA pre- and post-neoadjuvant therapy evaluated by mIHC. SD, standard deviation; CI, confidence interval. Statistical differences were tested using two-tailed paired t-tests. \* p-value <0.05, \*\* p-value <0.01.
